# Supplementary material for: Boosting the charge transfer of FeOOH/Ni(OH)2 for excellent oxygen evolution reaction via Cr modification
Source: Royal Society of Chemistry journal article supplement (doi:10.1039/d1dt01469b), 2021-01-01
Supplement: d1dt01469b1.pdf [file d1dt01469b1.pdf]

Supporting Information

**Boosting charge transfer of FeOOH/Ni(OH)<sub>2</sub> for excellent  
oxygen evolution reaction via Cr modification**

Yan He<sup>1,2</sup>, Tao Yu<sup>1,2</sup>, Hui Wen<sup>1,2</sup>, and Rui Guo<sup>1,2\*</sup>

<sup>1</sup>*School of Materials Science and Engineering, Northeastern University, Shenyang  
110819*

<sup>2</sup>*School of Resources and Materials, Northeastern University at Qinhuangdao,  
066004, China*

\*Corresponding author: guorui@neuq.edu.cn (Rui Guo)

**Table S1.** A comparison of OER activity of some selected NiFe-related catalysts

| Catalysts                                             | Substrate     | Solution | Overpotential (mV)            | Ref.      |
|-------------------------------------------------------|---------------|----------|-------------------------------|-----------|
| Co <sup>2+</sup> -NiFe LDH                            | glassy carbon | 1 M KOH  | 265 mV@10 mA·cm <sup>-2</sup> | [1]       |
| Co <sup>3+</sup> -NiFe LDH                            | carbon fiber  | 1 M KOH  | 295 mV@10 mA·cm <sup>-2</sup> | [2]       |
| NiFeMn LDH                                            | carbon fiber  | 1 M KOH  | 262 mV@10 mA·cm <sup>-2</sup> | [3]       |
| NiFeV LDH                                             | Ni foam       | 1 M KOH  | 231 mV@10 mA·cm <sup>-2</sup> | [4]       |
| WO <sub>4</sub> <sup>2-</sup> -NiFe LDH               | Ni foam       | 1 M KOH  | 290 mV@10 mA·cm <sup>-2</sup> | [5]       |
| h-NiFeCr LDH                                          | Ni foam       | 1 M KOH  | 220 mV@10 mA·cm <sup>-2</sup> | [6]       |
| NiCoFe LDH NA                                         | carbon fiber  | 1 M KOH  | 270 mV@10 mA·cm <sup>-2</sup> | [7]       |
| NiCoFe LTH                                            | carbon fiber  | 1 M KOH  | 239 mV@10 mA·cm <sup>-2</sup> | [8]       |
| H <sub>2</sub> PO <sub>2</sub> <sup>-</sup> -NiFe LDH | carbon fiber  | 1 M KOH  | 245 mV@10 mA·cm <sup>-2</sup> | [9]       |
| NiFeCr                                                | carbon cloth  | 1 M KOH  | 291 mV@50 mA·cm <sup>-2</sup> | This work |

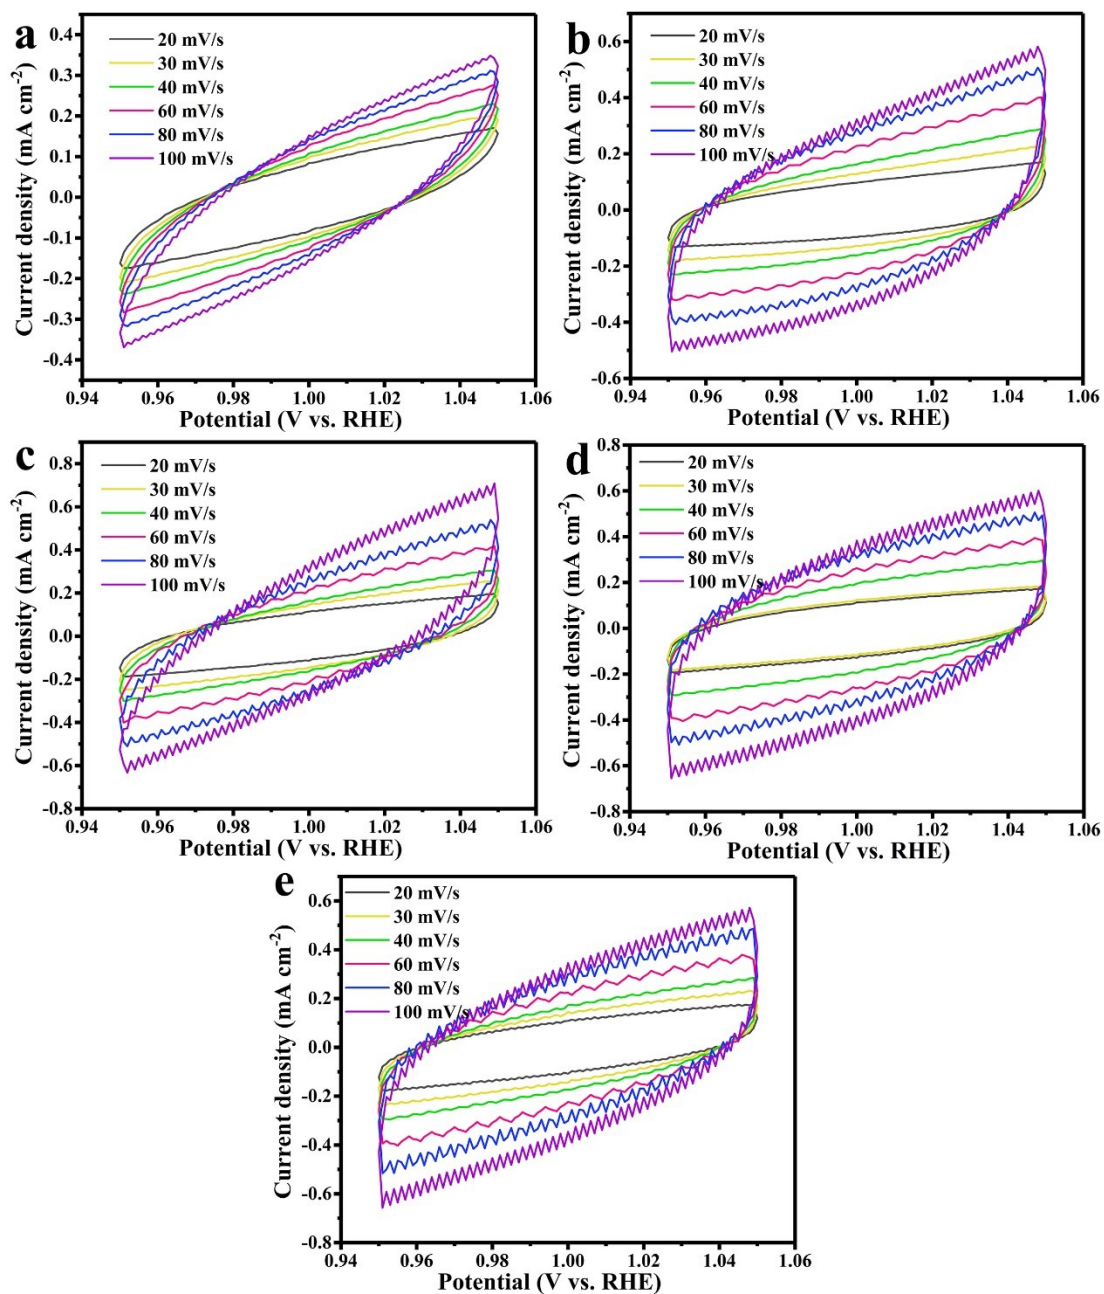

**Figure S1.** Cyclic voltammogram curves of CC (a), NiFe (b), NiFeCr-3 (c), NiFeCr-6 (d), and NiFeCr-9 (e) measured in the range of 0.95 ~ 1.05 V vs. RHE at different scan rates: 20, 30, 40, 60, 80, and 100 mV s<sup>-1</sup>.

**Table S2.** Fitted values of the equivalent circuit for the EIS simulation

| Catalysts | $R_s/\Omega$ | $C_1/\text{mF cm}^{-2}$ | $R_{ct}/\Omega$ | $C_2/\text{mF cm}^{-2}$ | $R_d/\Omega$ |
|-----------|--------------|-------------------------|-----------------|-------------------------|--------------|
| CC        | 1.57         | 0.127                   | 96.9            | 1.18                    | 1.46         |
| NiFe      | 1.86         | 0.161                   | 68.3            | 0.751                   | 3.77         |
| NiFeCr-3  | 1.73         | 0.322                   | 71.3            | 0.793                   | 1.67         |
| NiFeCr-6  | 1.64         | 3.49                    | 18.3            | 9.11                    | 14.5         |
| NiFeCr-9  | 1.86         | 2.98                    | 33.2            | 11.0                    | 9.38         |

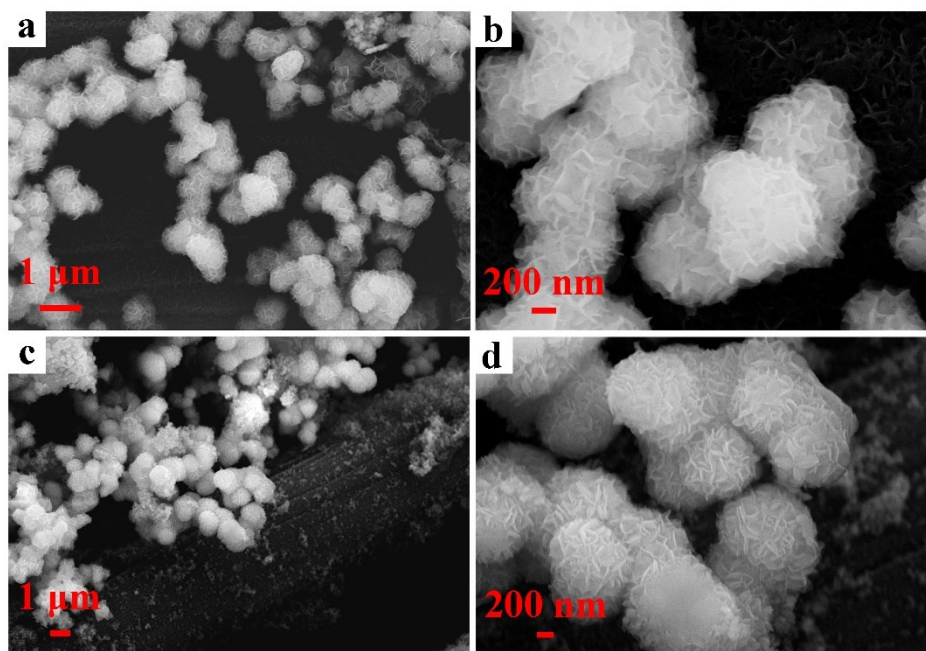

**Figure S2.** SEM images of NiFeCr-3 (a and b) and NiFeCr-9 (c and d) at high (left) and low (right) magnifications.

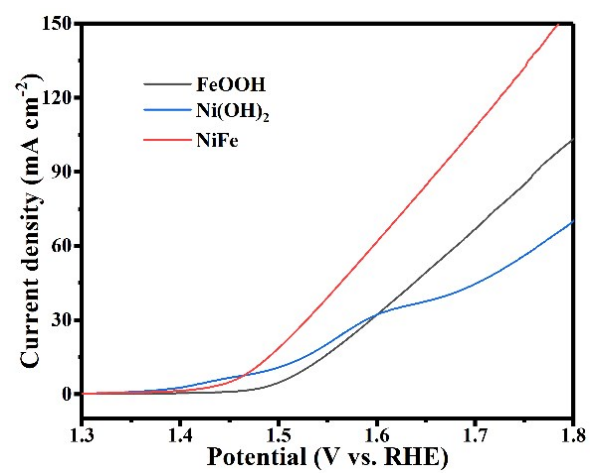

**Figure S3.** LSV curves of different electrocatalysts (Ni(OH)<sub>2</sub>, FeOOH, and NiFe).

## Note S1.

The overpotential value for SCE in 1 M KOH in the manuscript was calculated from the Nernst equation with 13.6 pH value. When the reference electrode was calibrated, the calibrated value of overpotential for SCE in 1 M KOH at 25 °C is 0.991 V, which is about 49 mV smaller than that calculated from the Nernst equation with 13.6 pH value shown in **Fig. S4** (ACS Energy Lett. 2020, 5, 1083-1087).

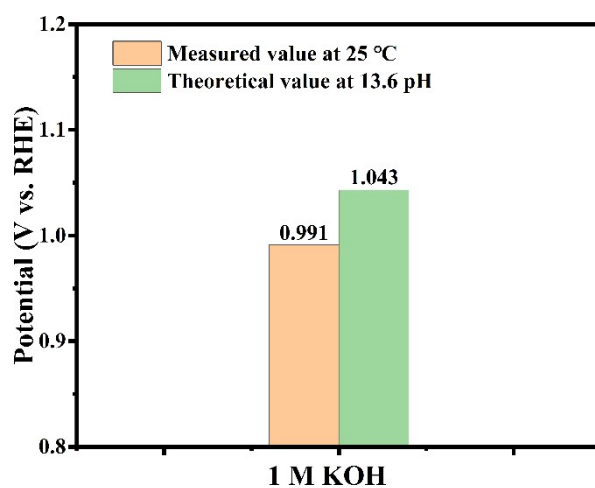

**Figure S4.** RHE calibrated the potential of SCE with different methodologies: measured at 25 °C (experimental calibration) and theoretically calculated values based on the Nernst equation with 13.6 pH value.

## References

- [1] A. Thenuwara, N. Attanayake, J. Yu, J. Perdew, E. Elzinga, Q. Yan, D. Strongin, Cobalt Intercalated Layered NiFe Double Hydroxides for the Oxygen Evolution Reaction, *The Journal of Physical Chemistry B*, 122 (2018) 847-854.
- [2] Y. Bi, Z. Cai, D. Zhou, Y. Tian, Q. Zhang, Q. Zhang, Y. Kuang, Y. Li, X. Sun, X. Duan, Understanding the incorporating effect of  $\text{Co}^{2+}/\text{Co}^{3+}$  in NiFe-layered double hydroxide for electrocatalytic oxygen evolution reaction, *J. Catal.*, 358 (2018) 100-107.
- [3] Z. Lu, L. Qian, Y. Tian, Y. Li, X. Sun, X. Duan, Ternary NiFeMn layered double hydroxides as highly-efficient oxygen evolution catalysts, *Chem. Commun.*, 52 (2016) 908-911.
- [4] K. Dinh, P. Zheng, Z. Dai, Y. Zhang, R. Dangol, Y. Zheng, B. Li, Y. Zong, Q. Yan, Ultrathin Porous NiFeV Ternary Layer Hydroxide Nanosheets as a Highly Efficient Bifunctional Electrocatalyst for Overall Water Splitting, *Small*, 14 (2018) 1703257.
- [5] X. Xue, F. Yu, B. Peng, G. Wang, Y. Lv, L. Chen, Y. Yao, B. Dai, Y. Shi, X. Guo, One-step synthesis of nickel-iron layered double hydroxides with tungstate acid anions via flash nano-precipitation for the oxygen evolution reaction, *Sustainable Energy & Fuels*, 3 (2019) 237-244.
- [6] X. Bo, Y. Li, R. Hocking, C. Zhao, NiFeCr Hydroxide Holey Nanosheet as Advanced Electrocatalyst for Water Oxidation, *ACS Appl. Mater. Interfaces*, 9 (2017) 41239-41245.
- [7] Z. Lu, L. Qian, W. Xu, Y. Tian, M. Jiang, Y. Li, X. Sun, X. Duan, Dehydrated layered double hydroxides: Alcohothermal synthesis and oxygen evolution activity, *Nano Res.*, 9 (2016) 3152-3161.
- [8] A. Wang, H. Xu, G. Li, NiCoFe Layered Triple Hydroxides with Porous Structures as High-Performance Electrocatalysts for Overall Water Splitting, *ACS Energy Lett.*, 1 (2016) 445-453.
- [9] M. Luo, Z. Cai, C. Wang, Y. Bi, L. Qian, Y. Hao, L. Li, Y. Kuang, Y. Li, X. Lei, Z. Huo, W. Liu, H. Wang, X. Sun, X. Duan, Phosphorus oxoanion-intercalated layered double hydroxides for high-performance oxygen evolution, *Nano Res.*, 10 (2017) 1732-1739.
